# Supplementary material for: Colorless organometallic ionic liquids from cationic ruthenium sandwich complexes: thermal properties, liquid properties, and crystal structures of [Ru(η5-C5H5)(η6-C6H5R)][X] (X = N(SO2CF3)2, N(SO2F)2, PF6)
Source: Royal Society of Chemistry journal article supplement (doi:10.1039/c5dt00723b), 2015-01-01
Supplement: c5dt00723b1.pdf [file c5dt00723b1.pdf]

## Electronic supporting information

Colorless Organometallic Ionic Liquids from Cationic Ruthenium Sandwich  
Complexes: Thermal Properties, Liquid Properties, and Crystal Structures of  $[\text{Ru}(\eta^5\text{-C}_5\text{H}_5)(\eta^6\text{-C}_6\text{H}_5\text{R})][\text{X}]$  ( $\text{X} = \text{N}(\text{SO}_2\text{CF}_3)_2, \text{N}(\text{SO}_2\text{F})_2, \text{PF}_6$ )

**Aina Komurasaki, Yusuke Funasako, Tomoyuki Mochida\***

*Department of Chemistry, Graduate School of Science, Kobe University, Rokkodai, Nada, Hyogo 657-8501, Japan*

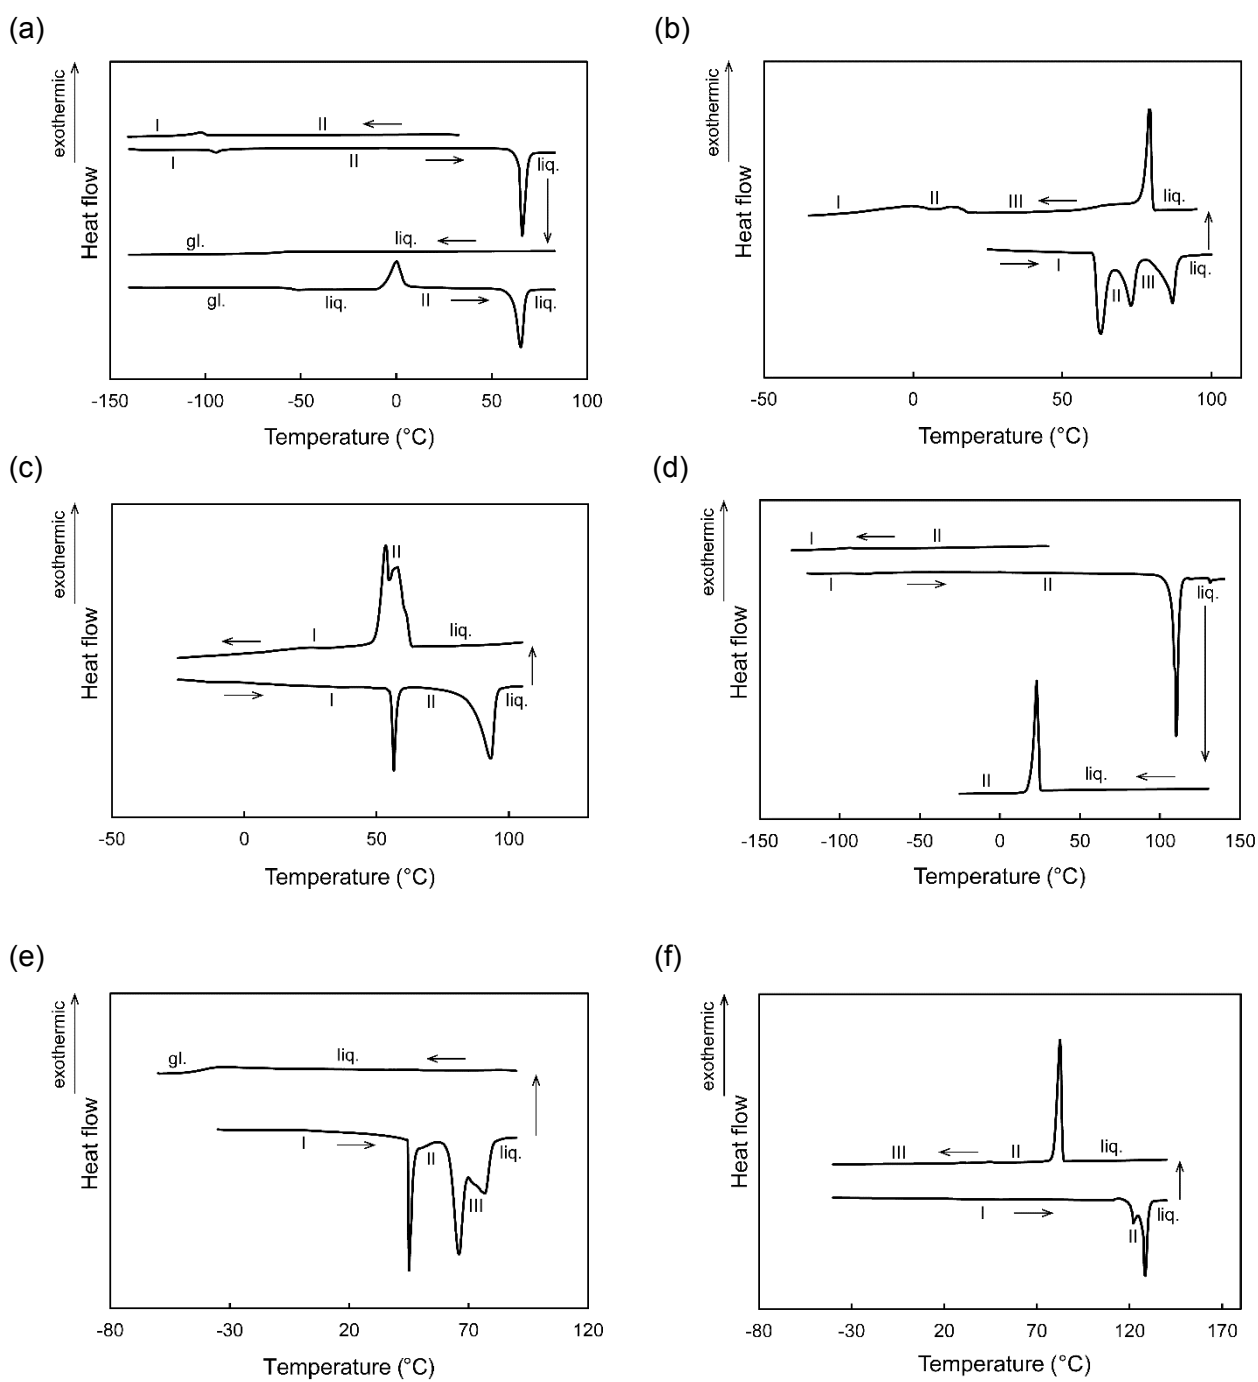

**Fig. S1.** DSC traces of (a) [4a][FSA], (b) [1a][PF<sub>6</sub>], (c) [1b][PF<sub>6</sub>], (d) [2a][PF<sub>6</sub>], (e) [2b][PF<sub>6</sub>], and (f) [4a][PF<sub>6</sub>]. Glassy state and liquid phase are indicated as gl. and liq., respectively.

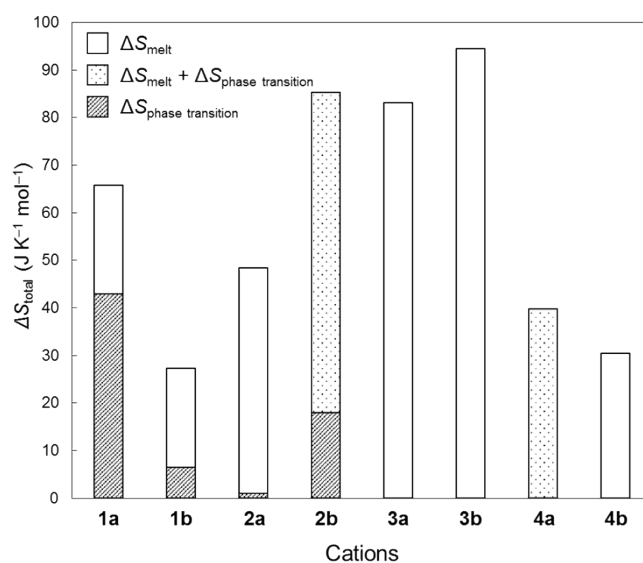

**Fig. S2.** Sum of the phase transition entropies of the PF<sub>6</sub> salts.

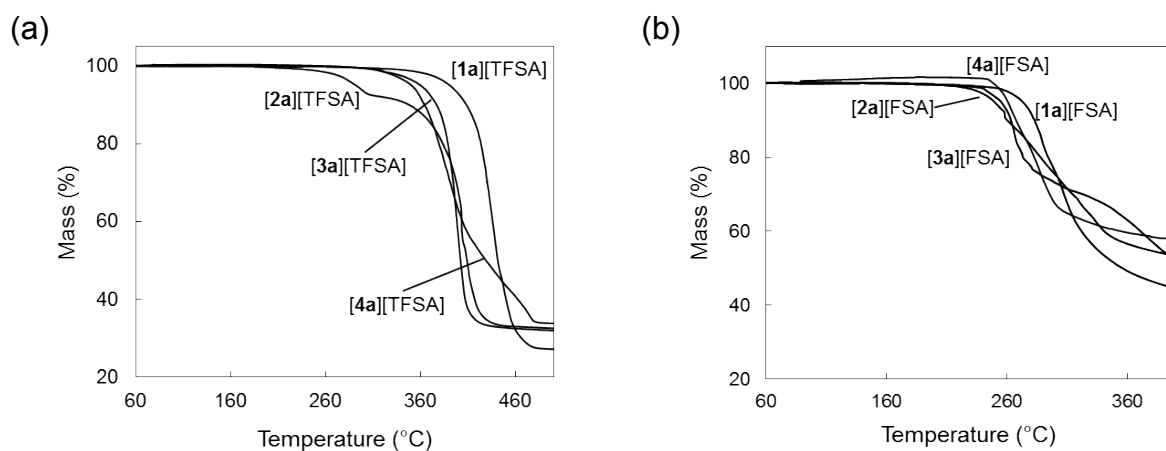

**Fig. S3.** Thermogravimetric traces of (a) [1a][TFSA]–[4a][TFSA] and (b) [1a][FSA]–[4a][FSA] (10 K min<sup>-1</sup>).

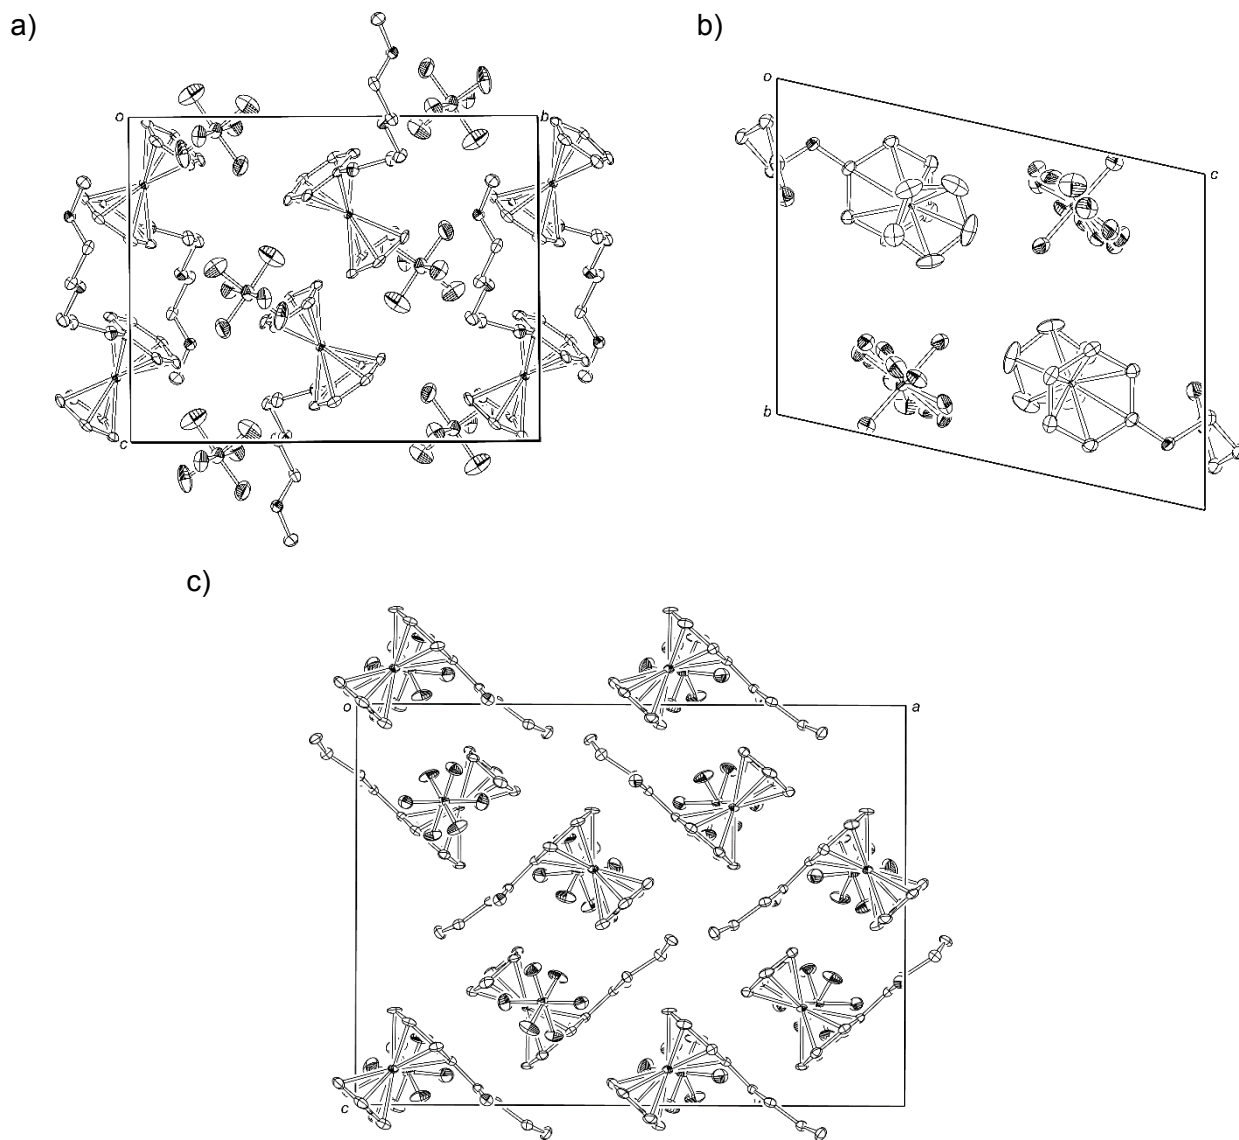

**Fig. S4.** Packing diagrams of (a)  $[2b][PF_6]$ , (b)  $[3a][PF_6]$ , and (c)  $[4a][PF_6]$ .

**Table S1.** Crystallographic parameters.

|                                                                                                       | [1a][PF <sub>6</sub> ]                             | [2a][PF <sub>6</sub> ]<br>(100 K)                                 | [2a][PF <sub>6</sub> ]<br>(293 K)           | [2b][PF <sub>6</sub> ]                                            |
|-------------------------------------------------------------------------------------------------------|----------------------------------------------------|-------------------------------------------------------------------|---------------------------------------------|-------------------------------------------------------------------|
| Empirical formula                                                                                     | C <sub>15</sub> H <sub>19</sub> F <sub>6</sub> PRu | C <sub>13</sub> H <sub>15</sub> F <sub>6</sub> O <sub>2</sub> PRu |                                             | C <sub>16</sub> H <sub>21</sub> F <sub>6</sub> O <sub>3</sub> PRu |
| Formula weight                                                                                        | 445.34                                             | 449.29                                                            |                                             | 507.37                                                            |
| Crystal system                                                                                        | Monoclinic                                         | Monoclinic                                                        | Orthorhombic                                | Monoclinic                                                        |
| Space group                                                                                           | <i>P</i> 2 <sub>1</sub> / <i>c</i>                 | <i>P</i> 2 <sub>1</sub> / <i>c</i>                                | <i>P</i> nma                                | <i>P</i> 2 <sub>1</sub> / <i>c</i>                                |
| <i>a</i> (Å)                                                                                          | 7.6403(10)                                         | 18.367(4)                                                         | 12.742(4)                                   | 10.573(3)                                                         |
| <i>b</i> (Å)                                                                                          | 9.1602(12)                                         | 8.8317(18)                                                        | 9.035(3)                                    | 14.685(4)                                                         |
| <i>c</i> (Å)                                                                                          | 23.401(3)                                          | 25.123(4)                                                         | 13.613(4)                                   | 14.804(3)                                                         |
| $\beta$ (°)                                                                                           | 108.800(4)                                         | 133.146(10)                                                       | 90.0                                        | 128.135(12)                                                       |
| Volume (Å <sup>3</sup> )                                                                              | 1550.4(3)                                          | 2973.4(10)                                                        | 1567.3(9)                                   | 1807.9(8)                                                         |
| <i>Z</i>                                                                                              | 4                                                  | 8                                                                 | 4                                           | 4                                                                 |
| <i>d</i> <sub>calcd.</sub> (g cm <sup>-3</sup> )                                                      | 1.908                                              | 2.007                                                             | 1.908                                       | 1.864                                                             |
| <i>T</i> (K)                                                                                          | 100                                                | 100                                                               | 293                                         | 100                                                               |
| $\mu$ (mm <sup>-1</sup> )                                                                             | 1.172                                              | 1.233                                                             | 1.17                                        | 1.03                                                              |
| Reflections collected                                                                                 | 8011                                               | 14283                                                             | 8253                                        | 8506                                                              |
| Independent reflections                                                                               | 3166<br>( <i>R</i> <sub>int</sub> = 0.0118)        | 5246<br>( <i>R</i> <sub>int</sub> = 0.0742)                       | 1775<br>( <i>R</i> <sub>int</sub> = 0.0211) | 3193<br>( <i>R</i> <sub>int</sub> = 0.0204)                       |
| <i>F</i> (000)                                                                                        | 888                                                | 1776                                                              | 888                                         | 1016                                                              |
| <i>R</i> <sub>1</sub> <sup>a</sup> , <i>wR</i> <sub>2</sub> <sup>b</sup> ( <i>I</i> > 2σ( <i>I</i> )) | 0.0281, 0.0634                                     | 0.0286, 0.0741                                                    | 0.0307, 0.0786                              | 0.0421, 0.1110                                                    |
| <i>R</i> <sub>1</sub> <sup>a</sup> , <i>wR</i> <sub>2</sub> <sup>b</sup> (all data)                   | 0.0305, 0.0649                                     | 0.0292, 0.0752                                                    | 0.0330, 0.0803                              | 0.0440, 0.1128                                                    |
| Goodness-of-fit on <i>F</i> <sup>2</sup>                                                              | 1.139                                              | 1.079                                                             | 1.083                                       | 1.069                                                             |
| Completeness to $\theta$ (%)                                                                          | 99.5                                               | 99.7                                                              | 99.8                                        | 99.8                                                              |
| Parameters                                                                                            | 209                                                | 418                                                               | 203                                         | 246                                                               |
| Largest diff. peak and hole                                                                           | 1.112 and<br>-0.570                                | 0.724 and<br>-0.727                                               | 0.450 and<br>-0.463                         | 2.576 and<br>0.891                                                |

a)  $R_1 = \sum ||F_o| - |F_c|| / \sum |F_o|$ , b)  $wR_2 = [\sum w(F_o^2 - F_c^2)^2 / \sum w(F_o^2)^2]^{1/2}$

(Continued)

|                                                                                                       | [3a][PF <sub>6</sub> ]                               | [3b][PF <sub>6</sub> ]                               | [4a][PF <sub>6</sub> ]                              |
|-------------------------------------------------------------------------------------------------------|------------------------------------------------------|------------------------------------------------------|-----------------------------------------------------|
| Empirical formula                                                                                     | C <sub>15</sub> H <sub>16</sub> F <sub>6</sub> NOPRu | C <sub>18</sub> H <sub>22</sub> F <sub>6</sub> NOPRu | C <sub>15</sub> H <sub>17</sub> F <sub>6</sub> OPRu |
| Formula weight                                                                                        | 472.33                                               | 514.41                                               | 459.33                                              |
| Crystal system                                                                                        | Triclinic                                            | Monoclinic                                           | Orthorhombic                                        |
| Space group                                                                                           | <i>P</i> $\bar{1}$                                   | <i>C</i> 2/c                                         | <i>P</i> ca2 <sub>1</sub>                           |
| <i>a</i> (Å)                                                                                          | 7.2737(14)                                           | 9.871 (2)                                            | 20.886(3)                                           |
| <i>b</i> (Å)                                                                                          | 10.0402(19)                                          | 19.268(5)                                            | 10.4222(13)                                         |
| <i>c</i> (Å)                                                                                          | 12.517(2)                                            | 20.870(5)                                            | 15.2449(19)                                         |
| $\beta$ (°)                                                                                           | 85.737(2)                                            | 96.111 (4)                                           | 90.0                                                |
| Volume (Å <sup>3</sup> )                                                                              | 845.8(3)                                             | 2973.4(10)                                           | 3318.5(7)                                           |
| <i>Z</i>                                                                                              | 2                                                    | 8                                                    | 8                                                   |
| <i>d</i> <sub>calcd.</sub> (g cm <sup>-3</sup> )                                                      | 1.855                                                | 1.731                                                | 1.839                                               |
| <i>T</i> (K)                                                                                          | 100                                                  | 100                                                  | 100                                                 |
| $\mu$ (mm <sup>-1</sup> )                                                                             | 1.086                                                | 0.939                                                | 1.103                                               |
| Reflections collected                                                                                 | 4167                                                 | 8906                                                 | 17705                                               |
| Independent reflections                                                                               | 3013<br>( <i>R</i> <sub>int</sub> = 0.0137)          | 3380<br>( <i>R</i> <sub>int</sub> = 0.0647)          | 6457<br>( <i>R</i> <sub>int</sub> = 0.0579)         |
| <i>F</i> (000)                                                                                        | 468                                                  | 2064                                                 | 1824                                                |
| <i>R</i> <sub>1</sub> <sup>a</sup> , <i>wR</i> <sub>2</sub> <sup>b</sup> ( <i>I</i> > 2σ( <i>I</i> )) | 0.0179, 0.0478                                       | 0.0414, 0.0930                                       | 0.0389, 0.1086                                      |
| <i>R</i> <sub>1</sub> <sup>a</sup> , <i>wR</i> <sub>2</sub> <sup>b</sup> (all data)                   | 0.0183, 0.0481                                       | 0.0594, 0.1003                                       | 0.0411, 0.1111                                      |
| Goodness-of-fit on <i>F</i> <sup>2</sup>                                                              | 1.068                                                | 1.015                                                | 1.042                                               |
| Completeness to $\theta$ (%)                                                                          | 97.6                                                 | 97.0                                                 | 100.0                                               |
| Parameters                                                                                            | 301                                                  | 308                                                  | 436                                                 |
| Largest diff. peak and hole                                                                           | 0.353 and -0.389                                     | 0.910 and -0.889                                     | 1.363 and -1.133                                    |

a)  $R_1 = \sum ||F_o| - |F_c|| / \sum |F_o|$ , b)  $wR_2 = [\sum w(F_o^2 - F_c^2)^2 / \sum w(F_o^2)^2]^{1/2}$
